# Supplementary material for: Japanese Nationwide Study on the Association Between Short-term Exposure to Particulate Matter and Mortality
Source: PubMed Central journal article supplement (PMC6859079; doi:10.2188/jea.je20180122), 2019-12-05
Supplement: je-29-471-s001.pdf [file je-29-471-s001.pdf]

**eTable 1.** Descriptive data on the study period, total non-accidental death, and environmental factors for 100 Japanese cities

| Prefecture | City      | Region            | 2015 Population Census |                         | Study period | Total non-accidental death (ICD-10 A00-R99) | Days   | Frequency of days with daily mean $\geq 25 \mu\text{g}/\text{m}^3$ | PM <sub>2.5</sub> ( $\mu\text{g}/\text{m}^3$ ) |      |                             |        |                             | Coarse PM ( $\mu\text{g}/\text{m}^3$ ) |      | O <sub>3</sub> (ppb) |      | NO <sub>2</sub> (ppb) |      | SO <sub>2</sub> (ppb) |      | Ambient temperature (°C) |      | Relative humidity (%) |     |      |
|------------|-----------|-------------------|------------------------|-------------------------|--------------|---------------------------------------------|--------|--------------------------------------------------------------------|------------------------------------------------|------|-----------------------------|--------|-----------------------------|----------------------------------------|------|----------------------|------|-----------------------|------|-----------------------|------|--------------------------|------|-----------------------|-----|------|
|            |           |                   | Population             | Area (km <sup>2</sup> ) |              |                                             |        |                                                                    | Mean                                           | SD   | 25 <sup>th</sup> percentile | Median | 75 <sup>th</sup> percentile | Mean                                   | SD   | Mean                 | SD   | Mean                  | SD   | Mean                  | SD   | Mean                     | SD   | Mean                  | SD  | Mean |
| 1          | Hokkaido  | Sapporo           | East                   | 1952356                 | 1121.3       | 4/12-3/15                                   | 39380  | 1091                                                               | 2.2                                            | 8.0  | 6.1                         | 4.2    | 6.8                         | 10.2                                   | 4.0  | 2.6                  | 41.5 | 11.4                  | 10.1 | 7.6                   | 0.8  | 1.0                      | 9.6  | 9.8                   | 70  | 11   |
| 2          |           | Asahikawa         | East                   | 339605                  | 747.7        | 4/12-3/15                                   | 10612  | 1088                                                               | 7.2                                            | 13.3 | 8.6                         | 8.1    | 11.3                        | 15.6                                   |      |                      | 11.7 | 10.4                  | 0.8  | 0.8                   | 7.6  | 11.0                     | 7.6  | 9                     | 76  | 9    |
| 3          |           | Hakodate          | East                   | 265979                  | 677.9        | 4/12-3/15                                   | 9406   | 1083                                                               | 4.6                                            | 12.6 | 6.7                         | 8.1    | 11.5                        | 15.3                                   |      |                      | 11.6 | 6.2                   | 1.4  | 0.9                   | 9.8  | 9.4                      | 7.5  | 9                     | 76  | 9    |
| 4          | Aomori    | Aomori            | East                   | 287648                  | 824.6        | 4/13-3/15                                   | 6131   | 724                                                                | 5.5                                            | 11.9 | 7.1                         | 7.5    | 10.3                        | 14.4                                   | 4.2  | 4.8                  |      |                       | 7.8  | 5.2                   |      |                          | 10.9 | 9.4                   | 7.6 | 10   |
| 5          |           | Hachinohe         | East                   | 231257                  | 305.5        | 4/12-3/15                                   | 6823   | 1087                                                               | 5.9                                            | 12.3 | 7.4                         | 7.0    | 10.7                        | 15.6                                   |      |                      | 8.5  | 4.2                   | 2.8  | 1.9                   | 10.6 | 9.0                      | 7.6  | 12                    | 10  | 11   |
| 6          | Iwate     | Morioka           | East                   | 297631                  | 459.2        | 4/12-3/15                                   | 7424   | 1089                                                               | 5.4                                            | 12.3 | 8.4                         | 7.2    | 10.2                        | 15.7                                   |      |                      | 37.1 | 11.3                  |      |                       | 11.0 | 9.4                      | 11.0 | 9.7                   | 75  | 11   |
| 7          |           | Sendai            | East                   | 1082159                 | 786.3        | 4/12-3/15                                   | 21332  | 1081                                                               | 5.6                                            | 11.7 | 7.6                         | 6.3    | 10.3                        | 15.7                                   |      |                      | 38.3 | 11.5                  | 10.7 | 5.4                   | 0.5  | 0.5                      | 13.0 | 8.6                   | 71  | 13   |
| 8          | Akita     | Akita             | East                   | 315814                  | 906.1        | 4/12-3/15                                   | 9295   | 1081                                                               | 8.1                                            | 13.6 | 8.1                         | 8.0    | 11.5                        | 16.9                                   | 6.7  | 6.2                  | 43.9 | 10.2                  | 4.7  | 2.7                   | 1.1  | 0.7                      | 12.3 | 9.4                   | 73  | 10   |
| 9          | Yamagata  | Yamagata          | East                   | 253832                  | 381.3        | 4/12-3/15                                   | 7202   | 1088                                                               | 6.7                                            | 12.5 | 8.0                         | 6.8    | 10.8                        | 16.6                                   | 2.5  | 3.6                  | 41.1 | 12.5                  | 10.3 | 6.6                   | 1.2  | 0.8                      | 12.1 | 9.7                   | 74  | 11   |
| 10         | Fukushima | Fukushima         | East                   | 294247                  | 767.7        | 4/14-3/15                                   | 2801   | 363                                                                | 5.8                                            | 11.3 | 6.9                         | 6.0    | 10.4                        | 14.9                                   | 7.9  | 2.5                  | 38.9 | 12.2                  | 9.6  | 5.8                   | 0.7  | 0.5                      | 13.5 | 8.1                   | 69  | 12   |
| 11         |           | Koriyama          | East                   | 335444                  | 757.2        | 4/13-3/15                                   | 5551   | 726                                                                | 6.3                                            | 12.0 | 7.4                         | 6.7    | 10.5                        | 15.1                                   | 3.7  | 2.5                  | 41.8 | 12.6                  | 9.6  | 4.9                   | 1.3  | 0.5                      | 12.0 | 8.9                   | 73  | 13   |
| 12         |           | Iwaki             | East                   | 350237                  | 722.2        | 4/13-3/15                                   | 7385   | 722                                                                | 8.2                                            | 12.3 | 8.1                         | 6.5    | 10.3                        | 15.5                                   | 8.8  | 4.4                  | 40.0 | 12.2                  | 8.8  | 4.9                   | 2.7  | 2.5                      | 13.8 | 7.6                   | 72  | 15   |
| 13         | Ibaraki   | Mito              | East                   | 270783                  | 217.3        | 4/12-3/15                                   | 6624   | 1084                                                               | 5.1                                            | 12.2 | 7.0                         | 7.1    | 10.6                        | 15.5                                   | 4.2  | 4.7                  | 43.2 | 13.6                  | 7.6  | 3.2                   | 0.6  | 0.4                      | 14.3 | 8.3                   | 73  | 14   |
| 14         |           | Tsukuba-Tsuchiura | East                   | 367767                  | 406.6        | 4/12-3/15                                   | 7804   | 1038                                                               | 12.9                                           | 15.9 | 9.0                         | 9.8    | 14.2                        | 19.8                                   | 8.6  | 4.4                  | 41.0 | 15.0                  | 11.0 | 6.2                   | 0.6  | 0.5                      | 14.5 | 8.6                   | 72  | 14   |
| 15         | Tochigi   | Utsunomiya        | East                   | 518594                  | 416.9        | 4/13-3/15                                   | 7985   | 729                                                                | 8.0                                            | 13.5 | 7.5                         | 8.0    | 12.4                        | 17.3                                   | 3.9  | 3.9                  | 46.0 | 17.1                  | 10.3 | 5.3                   |      |                          | 14.4 | 8.8                   | 67  | 14   |
| 16         | Gunma     | Maebashi          | East                   | 336154                  | 311.6        | 4/12-3/15                                   | 9343   | 1065                                                               | 14.0                                           | 15.3 | 9.1                         | 8.3    | 14.4                        | 20.8                                   |      |                      | 49.1 | 16.8                  | 8.0  | 4.0                   | 1.5  | 0.7                      | 15.2 | 8.8                   | 60  | 14   |
| 17         |           | Takasaki          | East                   | 370894                  | 459.2        | 4/14-3/15                                   | 3360   | 360                                                                | 14.4                                           | 15.7 | 9.8                         | 8.8    | 13.5                        | 20.4                                   | 6.1  | 6.0                  |      |                       |      |                       | 1.1  | 0.4                      | 15.2 | 8.8                   | 60  | 14   |
| 18         |           | Ota               | East                   | 219807                  | 175.5        | 4/13-3/15                                   | 3453   | 701                                                                | 11.1                                           | 15.0 | 8.4                         | 8.7    | 13.6                        | 19.7                                   |      |                      | 47.2 | 18.4                  | 12.4 | 6.6                   | 1.9  | 0.7                      | 15.2 | 8.8                   | 60  | 14   |
| 19         | Saitama   | Saitama           | East                   | 1263979                 | 217.4        | 4/13-3/15                                   | 16858  | 726                                                                | 9.9                                            | 14.4 | 8.3                         | 8.4    | 12.9                        | 18.6                                   | 7.1  | 7.0                  | 42.9 | 17.1                  | 15.7 | 7.4                   | 0.9  | 0.6                      | 15.6 | 8.7                   | 63  | 16   |
| 20         |           | Tokorozawa        | East                   | 340386                  | 72.1         | 4/12-3/15                                   | 6873   | 1084                                                               | 7.2                                            | 14.1 | 7.4                         | 8.8    | 13.2                        | 17.8                                   |      |                      | 44.9 | 17.4                  | 13.6 | 6.0                   | 0.6  | 0.5                      | 15.6 | 8.7                   | 63  | 16   |
| 21         |           | Kawaguchi         | East                   | 578112                  | 62.0         | 4/13-3/15                                   | 8140   | 722                                                                | 13.3                                           | 14.9 | 9.6                         | 8.1    | 12.4                        | 19.3                                   | 4.6  | 6.4                  | 41.2 | 16.8                  | 20.7 | 9.1                   | 2.0  | 1.2                      | 15.6 | 8.7                   | 63  | 16   |
| 22         |           | Kawago            | East                   | 350745                  | 109.1        | 4/14-3/15                                   | 2672   | 361                                                                | 10.2                                           | 14.8 | 8.1                         | 8.4    | 13.6                        | 19.9                                   |      |                      | 44.2 | 17.5                  | 14.6 | 6.5                   | 1.2  | 0.7                      | 15.6 | 8.7                   | 63  | 16   |
| 23         |           | Koshigaya         | East                   | 337498                  | 60.2         | 4/13-3/15                                   | 7210   | 1089                                                               | 7.0                                            | 15.0 | 8.4                         | 7.2    | 10.2                        | 15.4                                   | 4.1  | 4.9                  | 43.4 | 15.2                  | 9.7  | 4.3                   | 1.5  | 0.8                      | 15.6 | 8.7                   | 63  | 16   |
| 24         | Chiba     | Chiba             | East                   | 971882                  | 271.8        | 4/12-3/15                                   | 20053  | 1089                                                               | 14.0                                           | 15.2 | 10.5                        | 7.8    | 12.6                        | 20.0                                   | 10.2 | 5.9                  | 40.5 | 15.2                  | 11.9 | 6.4                   | 1.8  | 1.1                      | 16.4 | 7.9                   | 65  | 16   |
| 25         |           | Ichikawa          | East                   | 481732                  | 57.5         | 4/12-3/15                                   | 8722   | 1028                                                               | 14.0                                           | 15.2 | 9.9                         | 8.5    | 13.4                        | 19.5                                   | 5.7  | 5.5                  | 41.3 | 16.7                  | 16.6 | 8.9                   | 1.2  | 1.0                      | 16.4 | 7.9                   | 65  | 16   |
| 26         |           | Funabashi         | East                   | 622890                  | 85.6         | 4/12-3/15                                   | 11970  | 1081                                                               | 8.1                                            | 13.0 | 8.3                         | 7.0    | 11.2                        | 17.1                                   |      |                      | 40.0 | 15.3                  | 13.5 | 7.6                   | 1.6  | 1.1                      | 16.4 | 7.9                   | 65  | 16   |
| 27         |           | Matsudo           | East                   | 483480                  | 61.4         | 4/12-3/15                                   | 10127  | 1084                                                               | 9.4                                            | 13.7 | 8.8                         | 7.5    | 11.8                        | 17.8                                   |      |                      | 37.1 | 15.0                  | 17.9 | 8.3                   | 1.1  | 0.9                      | 16.4 | 7.9                   | 65  | 16   |
| 28         |           | Kashiwa           | East                   | 413954                  | 114.7        | 4/12-3/15                                   | 7722   | 1060                                                               | 8.4                                            | 13.5 | 8.2                         | 7.7    | 12.0                        | 17.7                                   | 4.3  | 5.2                  | 44.1 | 16.6                  | 14.2 | 7.8                   | 3.5  | 1.2                      | 16.4 | 7.9                   | 65  | 16   |
| 29         |           | Ichihara          | East                   | 274656                  | 368.2        | 4/13-3/15                                   | 6364   | 722                                                                | 15.2                                           | 14.5 | 9.2                         | 8.2    | 12.0                        | 19.0                                   |      |                      | 40.0 | 15.3                  | 13.2 | 7.2                   | 1.9  | 1.5                      | 16.7 | 7.9                   | 65  | 16   |
| 30         | Tokyo     | Tokyo's 23 wards  | East                   | 9272740                 | 626.7        | 4/12-3/15                                   | 199866 | 1073                                                               | 15.9                                           | 17.0 | 9.0                         | 10.5   | 15.4                        | 21.2                                   | 3.8  | 3.7                  | 35.4 | 14.6                  | 22.9 | 9.3                   | 2.0  | 1.1                      | 16.8 | 8.2                   | 62  | 16   |
| 31         |           | Hachioji          | East                   | 577513                  | 186.4        | 4/12-3/15                                   | 12788  | 1093                                                               | 5.7                                            | 12.8 | 6.7                         | 8.0    | 11.5                        | 15.9                                   |      |                      | 41.6 | 17.9                  | 16.3 | 6.3                   | 1.4  | 0.4                      | 16.8 | 8.2                   | 62  | 16   |
| 32         |           | Machida           | East                   | 432348                  | 71.8         | 4/12-3/15                                   | 8924   | 1073                                                               | 9.6                                            | 14.7 | 7.8                         | 9.2    | 13.3                        | 18.5                                   | 5.2  | 4.3                  | 45.4 | 18.9                  | 14.1 | 6.5                   | 1.7  | 0.6                      | 16.8 | 8.2                   | 62  | 16   |
| 33         |           | Fuchu             | East                   | 260274                  | 29.4         | 4/13-3/15                                   | 3318   | 710                                                                | 11.0                                           | 15.0 | 8.1                         | 9.0    | 13.7                        | 18.8                                   | 5.4  | 4.2                  | 44.3 | 19.1                  | 17.3 | 7.5                   |      |                          | 16.8 | 8.2                   | 62  | 16   |
| 34         |           | Chofu             | East                   | 223061                  | 21.6         | 4/13-3/15                                   | 2647   | 663                                                                | 6.9                                            | 12.9 | 7.0                         | 7.8    | 11.8                        | 16.2                                   | 6.8  | 4.7                  | 42.0 | 18.2                  | 15.3 | 7.1                   |      |                          | 16.8 | 8.2                   | 62  | 16   |
| 35         |           | Nishitokyo        | East                   | 320012                  | 15.8         | 4/13-3/15                                   | 3125   | 663                                                                | 15.8                                           | 20.0 | 12.2                        | 11.5   | 14.5                        | 25.6                                   | 4.7  | 4.6                  | 47.5 | 19.1                  | 14.5 | 8.1                   | 1.1  | 0.7                      | 16.8 | 8.2                   | 62  | 16   |
| 36         | Kanagawa  | Yokohama          | East                   | 3724844                 | 437.5        | 4/12-3/15                                   | 78088  | 1083                                                               | 11.3                                           | 14.7 | 8.9                         | 8.4    | 12.8                        | 18.5                                   | 10.7 | 6.3                  | 38.2 | 15.7                  | 18.2 | 8.4                   | 4.0  | 3.1                      | 16.4 | 7.8                   | 66  | 16   |
| 37         |           | Kawasaki          | East                   | 1475213                 | 143.0        | 4/12-3/15                                   | 25624  | 1081                                                               | 7.7                                            | 13.6 | 7.7                         | 7.9    | 12.1                        | 17.4                                   | 5.1  | 5.0                  | 41.6 | 17.4                  | 18.6 | 8.9                   | 1.4  | 1.1                      | 16.4 | 7.8                   | 66  | 16   |
| 38         |           | Yokosuka          | East                   | 406586                  | 100.8        | 4/13-3/15                                   | 7990   | 708                                                                | 9.2                                            | 14.7 | 8.4                         | 8.8    | 12.8                        | 18.3                                   | 6.5  | 6.1                  | 43.6 | 16.3                  | 14.8 | 8.2                   | 2.6  | 1.4                      | 16.4 | 7.8                   | 66  | 16   |
| 39         |           | Sagamihara        | East                   | 173612                  | 253.7        | 4/12-3/15                                   | 14523  | 1083                                                               | 9.4                                            | 13.8 | 8.9                         | 7.5    | 12.0                        | 18.1                                   | 7.1  | 4.1                  | 42.3 | 17.2                  | 16.0 | 6.7                   | 2.9  | 1.1                      | 16.4 | 7.8                   | 66  | 16   |
| 40         |           | Hiratsuka         | East                   | 173612                  | 253.7        | 4/13-3/15                                   | 3942   | 703                                                                | 8.5                                            | 14.7 | 7.6                         | 9.8    | 13.3                        | 18.0                                   | 6.9  | 4.6                  | 41.4 | 17.2                  | 14.2 | 7.2                   | 0.9  | 0.7                      | 16.4 | 7.8                   | 66  | 16   |
| 41         |           | Fujisawa          | East                   | 423804                  | 69.6         | 4/12-3/15                                   | 6966   | 722                                                                | 11.1                                           | 14.5 | 8.4                         | 8.4    | 11.4                        | 16.2                                   | 4.4  | 4.8                  | 44.4 | 17.1                  | 14.5 | 8.1                   | 1.1  | 0.7                      | 16.4 | 7.8                   | 66  | 16   |
| 42         |           | Yamato            | East                   | 232922                  | 27.1         | 4/12-3/15                                   | 4612   | 1059                                                               | 8.4                                            | 14.3 | 7.6                         | 8.8    | 12.8                        | 18.3                                   | 7.1  | 3.3                  | 36.1 | 15.4                  | 19.4 | 7.3                   | 2.4  | 0.9                      | 16.4 | 7.8                   | 66  | 16   |
| 43         |           | Atsugi            | East                   | 225714                  | 93.8         | 4/14-3/15                                   | 1434   | 362                                                                | 4.4                                            | 11.6 | 6.9                         | 6.9    | 10.4                        | 14.9                                   | 13.7 | 6.5                  | 40.6 | 17.6                  | 16.1 | 7.4                   | 1.3  | 0.6                      | 16.4 | 7.8                   | 66  | 16   |
| 44         | Niigata   | Niigata           | East                   | 810157                  | 726.5        | 4/12-3/15                                   | 21735  | 1074                                                               | 7.7                                            | 12.7 | 8.0                         | 7.3    | 11.1                        | 16.0                                   | 8.3  | 3.8                  | 44.8 | 11.3                  | 8.6  | 4.2                   | 1.5  | 0.9                      | 14.0 | 9.0                   | 72  | 10   |
| 45         |           | Toyama            | Central                | 418686                  | 1241.8       | 4/12-3/15                                   | 11842  | 1095                                                               | 5.9                                            | 10.7 | 7.7                         | 5.6    | 9.2                         | 14.3                                   | 3.1  | 3.8                  | 44.2 | 12.2                  | 8.3  | 6.1                   | 0.9  | 0.5                      | 14.5 | 9.2                   | 74  | 12   |
| 46         |           | Ishikawa          | Central                | 465699                  | 468.6        | 4/13-3/15                                   | 7601   | 719                                                                | 7.9                                            | 12.7 | 7.8                         | 7.5    | 10.9                        | 15.7                                   | 4.7  | 4.4                  | 44.5 | 13.4                  | 9.7  | 4.3                   | 1.4  | 1.6                      | 15.1 | 9.0                   | 70  | 11   |
| 47         |           | Fukui             | Central                | 265904                  | 536.4        | 4/12-3/15                                   | 7199   | 1048                                                               | 12.0                                           | 14.2 | 8.9                         | 9.5    | 14.2                        | 19.6                                   | 4.6  | 3.3                  | 43.3 | 15.1                  | 8.2  | 4.0                   | 1.2  | 0.8                      | 14.9 | 9.2                   | 74  | 11   |
| 48         |           | Nagano            | Central                | 377598                  | 834.8        | 4/12-3/15                                   | 10529  | 1063                                                               | 4.8                                            | 11.7 | 7.1                         | 6.5    | 10.6                        | 15.7                                   | 3.6  | 3.7                  | 44.9 | 14.4                  | 5.8  | 4.6                   | 3.5  | 1.6                      | 12.3 | 9.8                   | 72  | 11   |
| 49         |           | Matsumoto         | East                   | 243293                  | 978.5        | 4/12-3/15                                   | 6348   | 1071                                                               | 3.1                                            | 11.0 | 6.5                         | 6.0    | 9.9                         | 15.0                                   | 4.9  | 4.8                  | 40.3 | 12.8                  | 9.4  | 6.2                   | 3.4  | 0.9                      | 12.3 | 9.6                   | 66  | 12   |
| 50         | Gifu      | Gifu              | Central                | 406735                  | 203.6        | 4/12-3/15                                   | 11140  | 1052                                                               | 7.3                                            | 13.1 | 8.1                         | 7.3    | 11.9                        | 17.1                                   |      |                      | 45.3 | 15.3                  | 9.3  | 3.9                   | 0.7  | 0.7                      | 16.2 | 8.9                   | 65  | 13   |
| 51         | Shizuoka  | Shizuoka          | East                   | 704989                  | 1411.9       | 4/13-3/15                                   | 8871   | 724                                                                | 7.0                                            | 12.9 | 8.0                         | 7.4    | 10.8                        | 16.2                                   | 8.2  | 7.1                  | 43.5 | 14.7                  | 10.1 | 4.0                   | 1.6  | 0.7                      | 16.9 | 7.6                   | 66  | 14   |
| 52         |           | Hamanatsu         | East                   | 737980                  | 1558.1       | 4/12-3/15                                   | 23486  | 1081                                                               | 8.7                                            | 13.3 | 8.3                         | 7.6    |                             |                                        |      |                      |      |                       |      |                       |      |                          |      |                       |     |      |

**eTable 2.** Pearson's correlation coefficients among daily mean pollutant concentrations

|                                       | PM <sub>2.5</sub> (µg/m <sup>3</sup> ) | Coarse PM (µg/m <sup>3</sup> ) <sup>a</sup> | Ox (ppb) <sup>b</sup> | NO <sub>2</sub> (ppb) | SO <sub>2</sub> (ppb) |
|---------------------------------------|----------------------------------------|---------------------------------------------|-----------------------|-----------------------|-----------------------|
| PM <sub>2.5</sub> , µg/m <sup>3</sup> | 1                                      |                                             |                       |                       |                       |
| Coarse PM, µg/m <sup>3a</sup>         | 0.33                                   | 1                                           |                       |                       |                       |
| Ox, ppb <sup>b</sup>                  | 0.37                                   | 0.09                                        | 1                     |                       |                       |
| NO <sub>2</sub> , ppb                 | 0.47                                   | 0.05                                        | -0.20                 | 1                     |                       |
| SO <sub>2</sub> , ppb                 | 0.42                                   | 0.24                                        | 0.26                  | 0.35                  | 1                     |

NO<sub>2</sub>, nitrogen dioxide; Ox, photochemical oxidants; PM, particulate matter; SO<sub>2</sub>, sulphur dioxide.

<sup>a</sup>Concentrations of coarse PM were calculated by subtracting PM<sub>2.5</sub> concentrations from those of suspended particulate matter.

<sup>b</sup>Daily maximum 8-h mean concentrations.

**eTable 3.** Pooled estimates for the association between coarse PM exposure and mortality in 77 Japanese cities, April 2012 to March 2015

|                                         | Lag0-1                                                                                 |               | Lag2                                                                                   |                | Lag3                                                                                   |                |
|-----------------------------------------|----------------------------------------------------------------------------------------|---------------|----------------------------------------------------------------------------------------|----------------|----------------------------------------------------------------------------------------|----------------|
|                                         | Percentage increase for 10 $\mu$ g/m <sup>3</sup> increase in coarse PM <sup>a,b</sup> | (95% CI)      | Percentage increase for 10 $\mu$ g/m <sup>3</sup> increase in coarse PM <sup>a,b</sup> | (95% CI)       | Percentage increase for 10 $\mu$ g/m <sup>3</sup> increase in coarse PM <sup>a,b</sup> | (95% CI)       |
| Total non-accidental (ICD-10: A00-R99)  | 2.3                                                                                    | (1.4 to 3.3)  | -1.4                                                                                   | (-2.2 to -0.7) | -0.9                                                                                   | (-1.6 to -0.2) |
| Cardiovascular disease (ICD-10: I00-99) | 2.6                                                                                    | (0.7 to 4.4)  | -0.9                                                                                   | (-2.4 to 0.5)  | -0.5                                                                                   | (-1.8 to 0.8)  |
| Coronary heart disease (ICD-10: I20-25) | 3.8                                                                                    | (0 to 7.7)    | 0.2                                                                                    | (-3.7 to 4.2)  | 1.2                                                                                    | (-2.2 to 4.6)  |
| Stroke (ICD-10: I60-69)                 | 2.7                                                                                    | (-0.9 to 6.4) | -2.2                                                                                   | (-5.2 to 0.8)  | -1.2                                                                                   | (-3.9 to 1.5)  |
| Respiratory disease (ICD-10: J00-99)    | 1.4                                                                                    | (-0.8 to 3.7) | -2.3                                                                                   | (-4.5 to 0)    | -0.8                                                                                   | (-2.7 to 1.1)  |

CI, confidence interval; ICD, international classification of diseases; PM, particulate matter.

<sup>a</sup>Concentrations of coarse PM were calculated by subtracting PM<sub>2.5</sub> concentrations from those of suspended particulate matter.

<sup>b</sup>Adjusted for coarse PM at lag0-1, lag2, and lag3 simultaneously, ambient temperature at lag0-1, relative humidity at lag0-1, and influenza epidemics.

**eFigure 1.** Location of monitoring stations in 100 Japanese cities

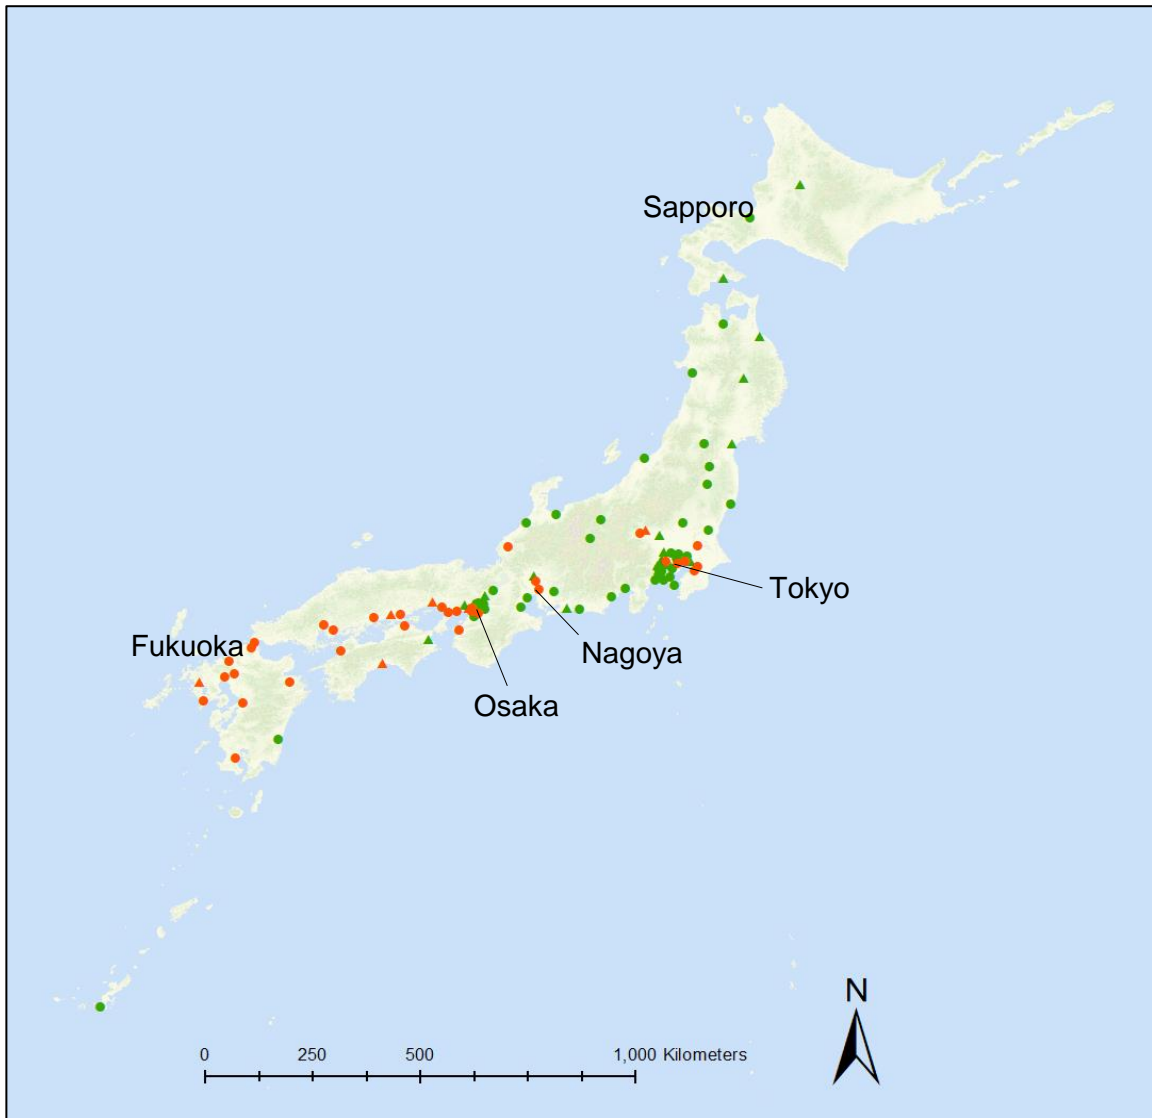

There are 77 cities included in the analysis of the coarse PM-mortality association (circle), and 23 cities not included (triangle). Green color means the average daily mean PM<sub>2.5</sub> concentration was  $\leq 15 \mu\text{g}/\text{m}^3$ , and orange color means that was  $> 15 \mu\text{g}/\text{m}^3$ .

**eFigure 2.** City-specific odds ratios (ORs) of total non-accidental death with a 10  $\mu\text{g}/\text{m}^3$  increase in  $\text{PM}_{2.5}$  concentrations at lag0-1

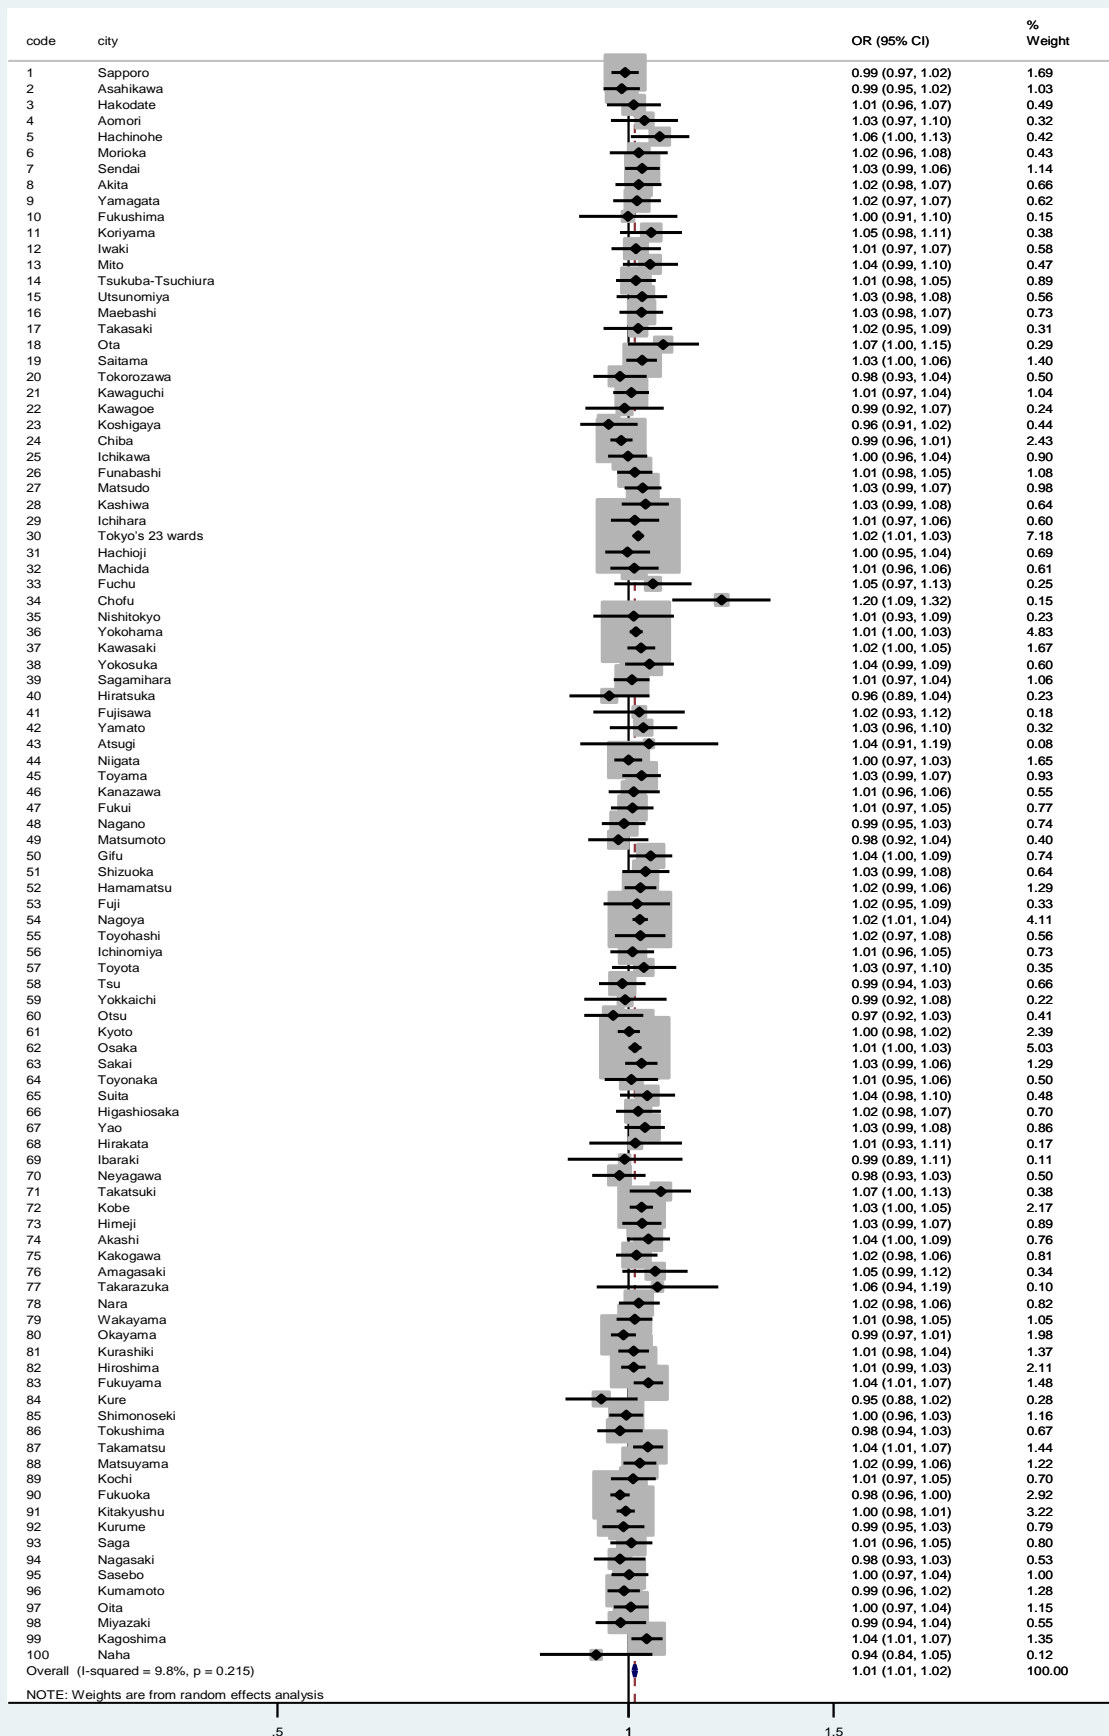

**eFigure 3.** City-specific odds ratios (ORs) of total non-accidental death with a 10  $\mu\text{g}/\text{m}^3$  increase in coarse particulate matter concentrations at lag0-1

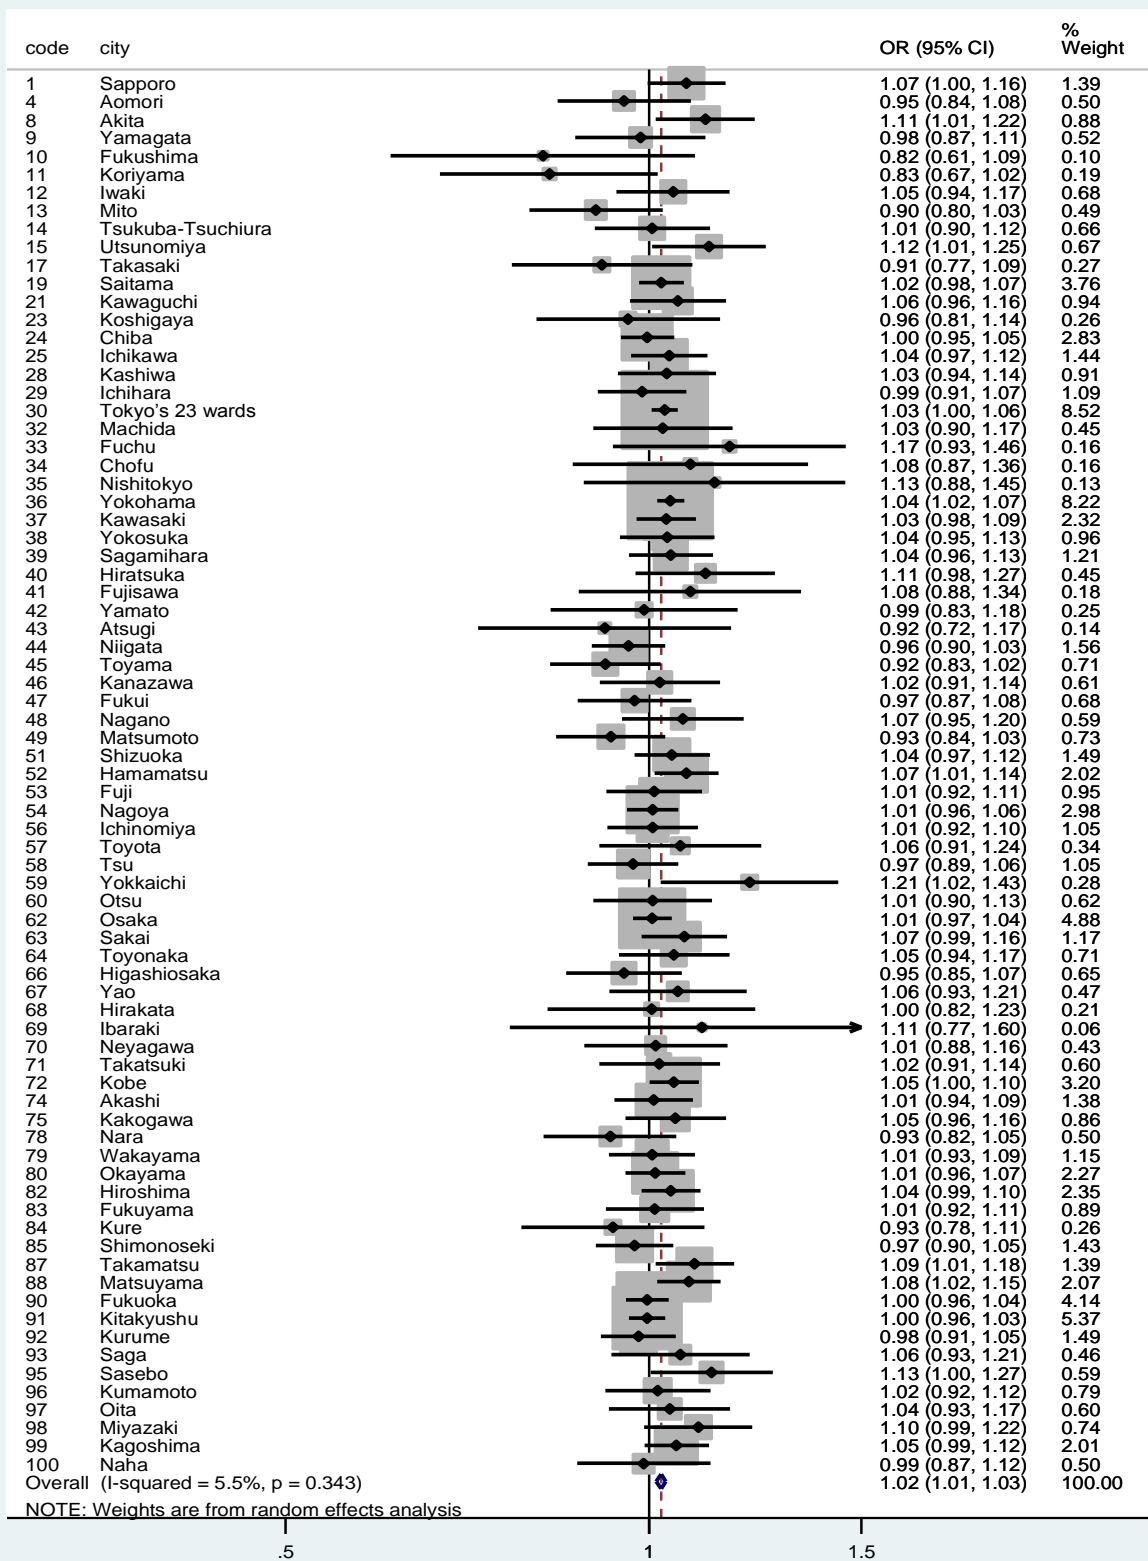

**eFigure 4.** Sensitivity and stratified analyses of the association between coarse PM exposure and total non-accidental mortality

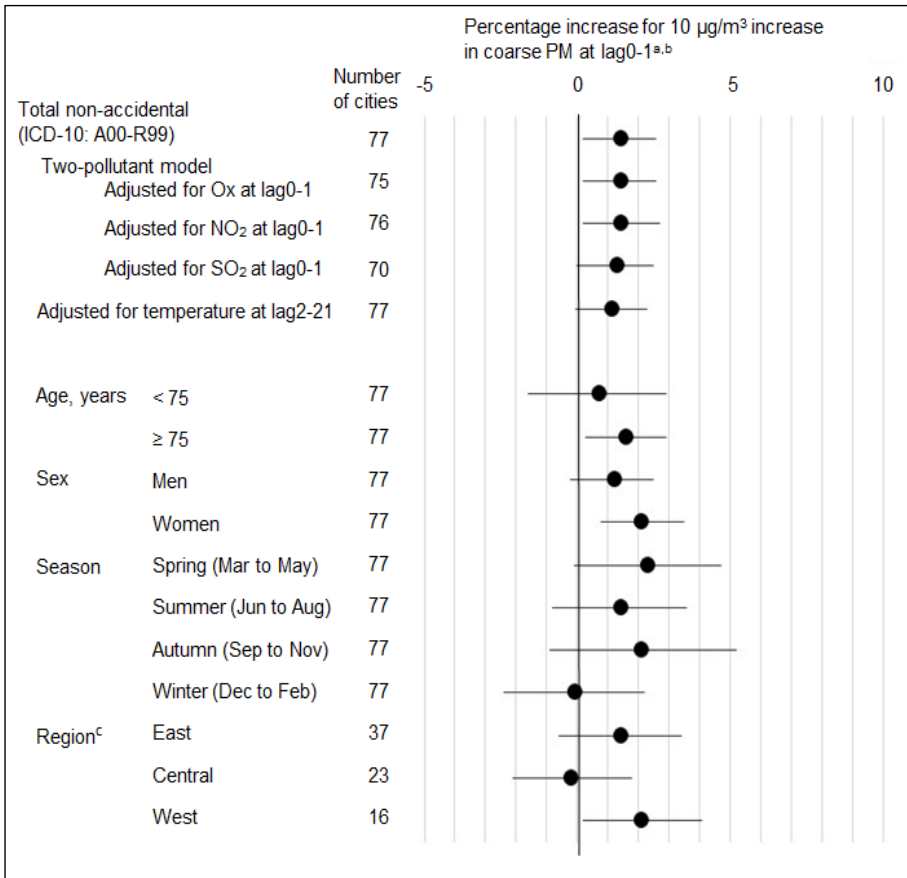

CI, confidence interval; ICD, international classification of diseases; NO<sub>2</sub>, nitrogen dioxide; Ox, photochemical oxidants; PM, particulate matter; SO<sub>2</sub>, sulphur dioxide.

<sup>a</sup>Concentrations of coarse PM were calculated by subtracting PM<sub>2.5</sub> concentrations from those of suspended particulate matter.

<sup>b</sup>Adjusted for PM<sub>2.5</sub> at lag0-1, coarse PM at lag2, and lag3, ambient temperature at lag0-1, relative humidity at lag0-1, and influenza epidemics.

<sup>c</sup>See eTable 1.
